# Supplementary material for: Climatic Aridity Shapes Post-Fire Interactions between Ceanothus spp. and Douglas-Fir (Pseudotsuga menziesii) across the Klamath Mountains
Source: MDPI journal article supplement (doi:10.3390/f12111567), 2021-11-13
Supplement: s1 [file s1]

## Article

# Climatic Aridity Shapes Post-Fire Interactions between *Ceanothus* spp. and Douglas-Fir (*Pseudotsuga menziesii*) across the Klamath Mountains

Damla Cinoğlu <sup>1\*</sup>, Howard E. Epstein <sup>2</sup>, Alan J. Tepley <sup>3</sup>, Kristina J. Anderson-Teixeira <sup>3,4</sup>, Jonathan R. Thompson <sup>5</sup>, and Steven S. Perakis<sup>6</sup>

<sup>1</sup> Department of Integrative Biology, University of Texas at Austin, Austin, TX 78712, USA

<sup>2</sup> Department of Environmental Sciences, University of Virginia, Charlottesville, VA 22904, USA; hee2b@virginia.edu

<sup>3</sup> Conservation Ecology Center, Smithsonian Conservation Biology Institute, Front Royal, VA 22630, USA; alan.tepley@mso.umt.edu (A.J.T.); teixeirak@si.edu (K.J.A.-T.)

<sup>4</sup> Center for Tropical Forest Science-Forest Global Earth Observatory, Smithsonian Tropical Research Institute, Panama, Republic of Panama

<sup>5</sup> Harvard Forest, Harvard University, Petersham, MA 01366, USA; jthomps@fas.harvard.edu

<sup>6</sup> U.S. Geological Survey, Forest and Rangeland Ecosystem Science Center, Corvallis, OR 97330, USA; sperakis@usgs.gov

\* Correspondence: dcinoglu@utexas.edu; Tel.: +1-434-466-7660

## Supplementary Materials

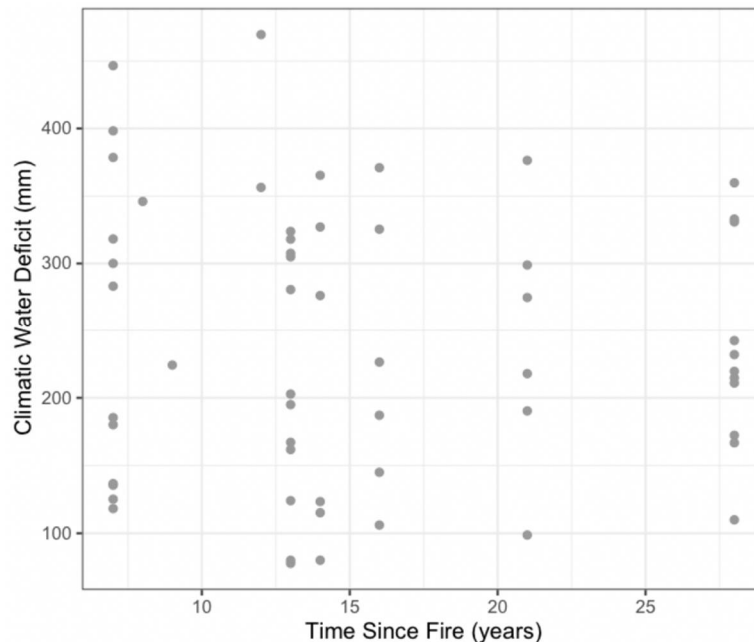

**Figure S1.** Climatic water deficit and time since fire. Scatter plot of climatic water deficit (78–470 mm) and time since fire (1985–2009) for 57 plots in the Klamath study region.

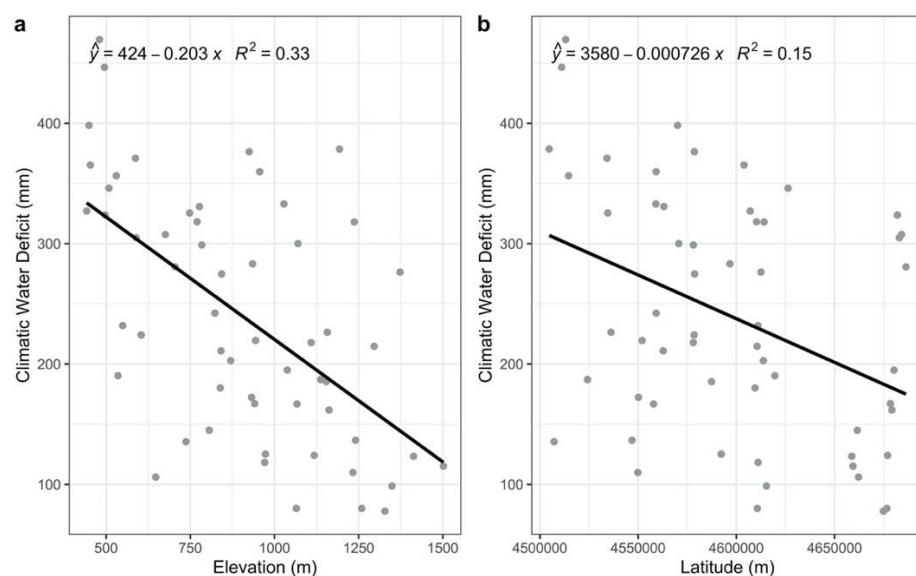

**Figure S2.** Elevation and latitude. Linear regressions of climatic water deficit (78–470 mm) of 57 plots in the Klamath study region for which site topographic variables of latitude (m) and elevation (m) have been assessed.

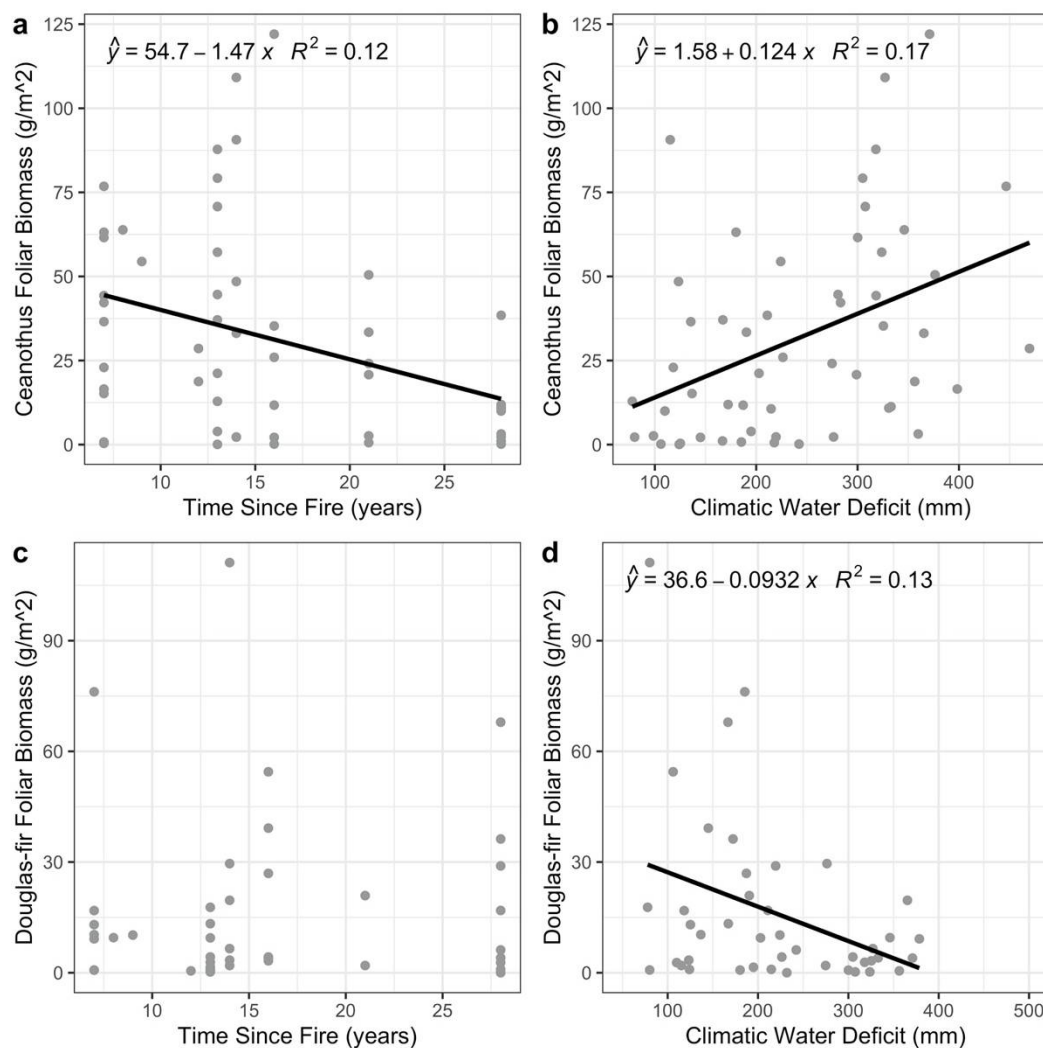

**Figure S3.** Foliar biomass regressions. Linear regressions of *Ceanothus* spp. and Douglas-fir foliar biomass with time since fire and climatic water deficit. Black regression lines demonstrate significant relationships ( $p < 0.05$ ).

**Table S1.** Species' Latin names. List of species Latin names and abbreviations.

| Abbreviation | Latin Name                               |
|--------------|------------------------------------------|
| ABCO         | <i>Abies concolor</i>                    |
| ACCI         | <i>Acer circinatum</i>                   |
| ACMA3        | <i>Acer macrophyllum</i>                 |
| ALRU         | <i>Alnus rubra</i>                       |
| AMAL2        | <i>Amelanchier alnifolia</i>             |
| ARCO3        | <i>Arctostaphylos columbiana</i>         |
| ARME         | <i>Arbutus menziesii</i>                 |
| ARPA6        | <i>Arctostaphylos patula</i>             |
| ARVI4        | <i>Arctostaphylos viscida</i>            |
| CADE27       | <i>Calocedrus decurrens</i>              |
| CECO         | <i>Ceanothus cordulatus</i>              |
| CECU         | <i>Ceanothus cuneatus</i>                |
| CEIN         | <i>Ceanothus integerrimus</i>            |
| CEOC         | <i>Cercis occidentalis</i>               |
| CEPR         | <i>Ceanothus prostratus</i>              |
| CESA         | <i>Ceanothus sanguineus</i>              |
| CETH         | <i>Ceanothus thyrsiflorus</i>            |
| CEVE         | <i>Ceanothus velutinus</i>               |
| CHCH7        | <i>Chrysolepis chrysophylla</i>          |
| COCOC        | <i>Corylus cornuta</i>                   |
| CONU4        | <i>Cornus nutallii</i>                   |
| COSE         | <i>Cornus sessilis</i>                   |
| FRCA         | <i>Frangula californica</i>              |
| GAFR         | <i>Garrya fremontii</i>                  |
| GASH         | <i>Gaultheria shallon</i>                |
| HEAR         | <i>Heteromeles arbutifolia</i>           |
| HODI         | <i>Holodiscus discolor</i>               |
| KECO         | <i>Keckiella corymbosum</i>              |
| LIDE3        | <i>Lithocarpus densifolius</i>           |
| LOCI         | <i>Lonicera ciliosa</i>                  |
| LOHE         | <i>Lonicera</i> spp.                     |
| LOHI2        | <i>Lonicera hispidula</i>                |
| LOSP         | <i>Lonicera</i> spp.                     |
| MAAQ2        | <i>Mahonia aquifolium</i>                |
| MANE         | <i>Mahonia nervosa</i>                   |
| PHLE         | <i>Philadelphus lewisii</i>              |
| PHMA         | <i>Physocarpus malvaceus</i>             |
| PHME         | <i>Physocarpus</i> spp.                  |
| PIAT         | <i>Pinus attenuata</i>                   |
| PILA         | <i>Pinus lambertiana</i>                 |
| PIMO         | <i>Pinus monticola</i>                   |
| PINUS        | <i>Pinus</i> , not identified to species |
| PIPO         | <i>Pinus ponderosa</i>                   |
| PREM         | <i>Prunus emarginata</i>                 |
| PSME         | <i>Pseudotsuga menziesii</i>             |

|       |                            |
|-------|----------------------------|
| QUCH2 | Quercus chrysolepis        |
| QUGA  | Quercus garryana           |
| QUKE  | Quercus kelloggii          |
| QUVA  | Quercus vaccinifolia       |
| RHPU  | Rhamnus purshiana          |
| RIRO  | Ribes roezlii              |
| RISA  | Ribes sanguineum           |
| ROGY  | Rosa gymnocarpa            |
| RUAR  | Rubus ar                   |
| RULE  | Rubus leucodermis          |
| RUPA  | Rubus parviflorus          |
| RUUR  | Rubus ursinus              |
| SACE3 | Sambucus cerula            |
| SALIX | Salix spp.                 |
| SAME  | Sambucus Mexicana          |
| SARA  | Sambucus racemose          |
| SYAL  | Symphoricarpos albiflorus  |
| SYMO  | Symphoricarpos mollis      |
| TODI  | Toxicodendron diversilobum |
| UMCA  | Umbellularia californica   |
| VACA  | Vaccinium caespitosum      |
| VAOV2 | Vaccinium ovatum           |
| VAPA  | Vaccinium parvifolium      |

Table S2. Regression models. Summary of the regression models included in the analysis.

| Response Variable   | Explanatory Variable(s)                            | R <sup>2</sup> | p-value                     | Coefficient(s)               |
|---------------------|----------------------------------------------------|----------------|-----------------------------|------------------------------|
| Ceanothus biomass   | Time since fire                                    | 0.1157         | 0.0136                      | −13.301                      |
| Ceanothus biomass   | Climatic water deficit                             | 0.08363        | 0.0376                      | 0.8236                       |
| Ceanothus biomass   | (1) Time since fire,<br>(2) Climatic water deficit | 0.1906         | (1) 0.01415,<br>(2) 0.03836 | (1) −12.7994,<br>(2) 0.7799  |
| Douglas-fir biomass | Time since fire                                    | 0.003813       | 0.694                       | 0.3667                       |
| Douglas-fir biomass | Climatic water deficit                             | 0.1329         | 0.016255                    | −0.17055                     |
| Douglas-fir biomass | (1) Time since fire,<br>(2) Climatic water deficit | 0.1352         | (1) 0.74326,<br>(2) 0.01807 | (1) 0.28814,<br>(2) −0.16973 |
| Soil C              | Time since fire                                    | 0.03754        | 0.156376                    | 0.1623                       |
| Soil C              | Climatic water deficit                             | 0.101          | 0.018                       | −0.018801                    |
| Soil N              | Time since fire                                    | 0.01268        | 0.413                       | 0.003011                     |

|                                        |                                                                                                       |                        |                                                |                                                     |          |
|----------------------------------------|-------------------------------------------------------------------------------------------------------|------------------------|------------------------------------------------|-----------------------------------------------------|----------|
| Soil N                                 |                                                                                                       | Climatic water deficit | 0.03059                                        | 0.202                                               | 0.006884 |
| Soil C:N                               | Time since fire                                                                                       | 0.05566                | 0.0829                                         | 0.2446                                              |          |
| Soil C:N                               | Climatic water deficit                                                                                | 0.1724                 | 0.00162                                        | −0.030393                                           |          |
| Soil N                                 | Ceanothus biomass                                                                                     | 5.558e-05              |                                                |                                                     |          |
| Soil C:N                               | Ceanothus biomass                                                                                     | 0.2552                 | 0.000183                                       | −0.013232                                           |          |
| Soil C:N                               | (1) Ceanothus biomass,<br>(2) Climatic water deficit,<br>(3) Ceanothus biomass:Climatic water deficit | 0.4278                 | (1) 0.001890,<br>(2) 0.000699,<br>(3) 0.033708 | (1) −0.02784,<br>(2) −0.04747,<br>(3) 6.47e-05      |          |
| Soil C:N                               | Climatic water deficit                                                                                | 0.2179                 | 0.000633                                       | −0.034599                                           |          |
| Douglas-fir biomass                    | Ceanothus biomass                                                                                     | 0.1582                 | 0.0122                                         | −0.05683                                            |          |
| Douglas-fir biomass                    | (1) Ceanothus biomass,<br>(2) Climatic water deficit,<br>(3) Ceanothus biomass:Climatic water deficit | 0.3078                 | (1) 0.0112,<br>(2) 0.0102,<br>(3) 0.0331       | (1) −1.697e-01,<br>(2) −3.042e-01,<br>(3) 5.098e-04 |          |
| Douglas-fir biomass residuals with CWD | Ceanothus biomass residuals with CWD                                                                  | 0.06819                | 0.108                                          | −0.03783                                            |          |
| Douglas-fir foliar biomass             | (1) Ceanothus foliar biomass,<br>(2) Climatic water deficit,<br>(3) Ceanothus                         | 0.3309                 | (1) 0.00816,<br>(2) 0.01188,<br>(3) 0.03238    | (1) −0.875897,<br>(2) −0.151098,<br>(3) 0.002516    |          |

| foliar<br>biomass:Climatic<br>water deficit         |                                                      |          |          |          |
|-----------------------------------------------------|------------------------------------------------------|----------|----------|----------|
| Ceanothus foliar<br>biomass                         | Time since fire                                      | 0.1215   | 0.0105   | −1.469   |
| Ceanothus foliar<br>biomass                         | Climatic water<br>deficit                            | 0.1675   | 0.00234  | 0.12447  |
| Douglas-fir foliar<br>biomass                       | Time since fire                                      | 0.003057 | 0.725    | 0.1794   |
| Douglas-fir foliar<br>biomass                       | Climatic water<br>deficit                            | 0.1329   | 0.016230 | −0.09323 |
| Douglas-fir foliar<br>biomass residuals<br>with CWD | Ceanothus<br>foliar biomass<br>residuals with<br>CWD | 0.09263  | 0.0562   | −0.2288  |
